# Supplementary material for: Secreted HSP90α-LRP1 Signaling Promotes Tumor Metastasis and Chemoresistance in Pancreatic Cancer
Source: MDPI journal article supplement (doi:10.3390/ijms23105532), 2022-05-16
Supplement: s1 [file s1]

# **Secreted HSP90 $\alpha$ -LRP1 signaling promote tumor metastasis and chemoresistance in pancreatic cancer**

Nina Xue<sup>1</sup>, Tingting Du<sup>1</sup>, Fangfang Lai, Jing Jin, Ming Ji\*, Xiaoguang Chen\*

State Key Laboratory of Bioactive Substances and Functions of Natural Medicines & Beijing Key Laboratory of Non-Clinical Drug Metabolism and PK/PD study, Institute of Materia Medica, Chinese Academy of Medical Sciences and Peking Union Medical College, Beijing 100050, China

<sup>1</sup>These authors contributed equally to this work.

\*Correspondence to: Ming Ji and Xiaoguang Chen

E-mail address: [Jiming@imm.ac.cn](mailto:Jiming@imm.ac.cn) (M. Ji); [chxg@imm.ac.cn](mailto:chxg@imm.ac.cn) (X. Chen)

## **Acknowledgements**

This project was supported by the National Natural Science Foundation of China (81573466).

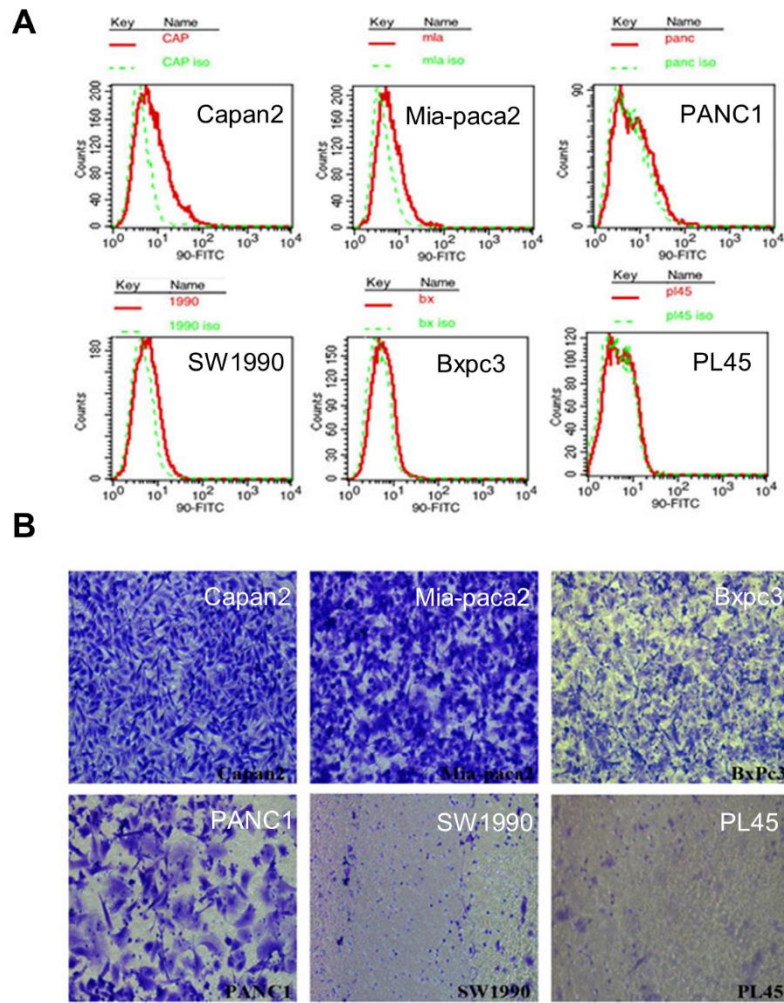

**Figure S1.** Membrane HSP90 $\alpha$  expression and invasive ability of PC cells. **(A)** The cell surface HSP90 $\alpha$  levels of Capan2, Mia-paca2, PANC1, SW1990, Bxpc3 and PL45 cells after serum starvation were detected using flow cytometry analysis. **(B)** The invasive abilities of above-mentioned PC cells were detected by transwell assay.

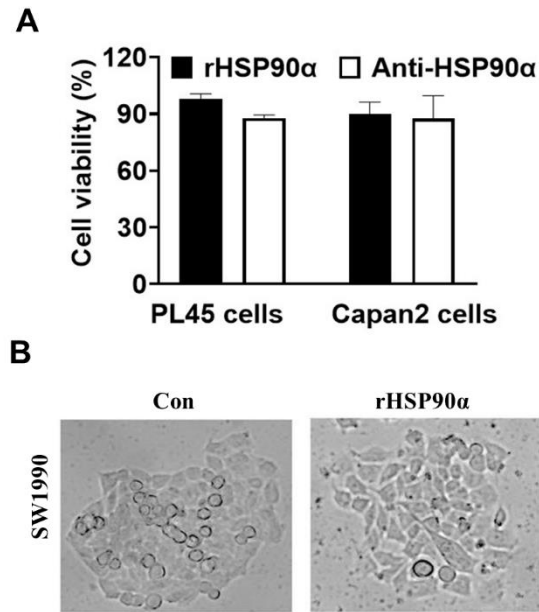

**Figure S2.** Cell viability and cellular morphology of PC cells. **(A)** The cell viability of PL45 and Capan2 was determined by MTT assay after exposure of (10  $\mu\text{g/mL}$ ) rHSP90 $\alpha$  or (5  $\mu\text{g/mL}$ ) anti-HSP90 $\alpha$  antibody for 72 h. **(B)** Images of SW1990 cells morphology were measured under a microscope after stimulated by (10  $\mu\text{g/mL}$ ) rHSP90 $\alpha$  for 72 h.

## methods

### *Flow cytometry assay*

The human PC cell lines including Capan2, Mia-paca2, SW1990, Bxpc3, PANC1 and PL45 were harvested and resuspend at a density of approximately  $2 \times 10^6$  cells/ mL in ice cold PBS. The cells were stained with 10 $\mu\text{g/mL}$  of Mouse monoclonal to HSP90 $\alpha$  antibody (ab79849) in 3% BSA/PBS and incubated for 1 h at 4°C. After washing for three times, the cells were incubated in the appropriate Alexa Fluor® 488 secondary antibody (1:500 dilution) for 30 minutes on ice in the dark. After washing, the membrane-bound HSP90 $\alpha$  expressions were measured by Beckman coulter flow cytometry. The samples stained with only fluorochrome-labeled secondary antibody were as negative control.
